# Supplementary material for: Human milk phospholipid analog improved the digestion and absorption of 1,3-dioleoyl-2-palmitoyl-glycerol
Source: Royal Society of Chemistry journal article supplement (doi:10.1039/d2fo03759a), 2023-01-01
Supplement: d2fo03759a1.pdf [file d2fo03759a1.pdf]

Table S1: Alteration of serum fatty acids depending on time

| Serum fatty acids<br>(mg/ml serum) | Time(h<br>) | C16:0     | C18:0     | C18:1     | C18:2     |
|------------------------------------|-------------|-----------|-----------|-----------|-----------|
| OPO                                | 0           | 0.19±0.07 | 0.11±0.05 | 0.07±0.01 | 0.23±0.06 |
|                                    | 0.5         | 0.21±0.02 | 0.13±0.03 | 0.11±0.01 | 0.25±0.01 |
|                                    | 1           | 0.21±0.12 | 0.12±0.08 | 0.10±0.02 | 0.24±0.02 |
|                                    | 2           | 0.28±0.03 | 0.17±0.04 | 0.10±0.02 | 0.29±0.02 |
|                                    | 3           | 0.32±0.05 | 0.19±0.03 | 0.13±0.04 | 0.35±0.04 |
|                                    | 5           | 0.20±0.03 | 0.12±0.01 | 0.08±0.02 | 0.25±0.02 |
| OPOC                               | 0           | 0.16±0.02 | 0.12±0.03 | 0.06±0.02 | 0.19±0.02 |
|                                    | 0.5         | 0.23±0.02 | 0.13±0.03 | 0.10±0.01 | 0.24±0.01 |
|                                    | 1           | 0.24±0.12 | 0.13±0.08 | 0.10±0.02 | 0.27±0.02 |
|                                    | 2           | 0.27±0.03 | 0.16±0.04 | 0.12±0.02 | 0.35±0.02 |
|                                    | 3           | 0.31±0.05 | 0.19±0.03 | 0.15±0.04 | 0.37±0.04 |
|                                    | 5           | 0.28±0.03 | 0.20±0.01 | 0.14±0.02 | 0.35±0.02 |
